# Supplementary material
Source: HighWire-hosted journal article supplement (http://ajnr-stage2.highwire.org/highwire/filestream/106722/field_highwire_adjunct_files/0/0910.pdf)
Supplement: 0910.pdf [file 0910.pdf]

## Online supplementary material

### Supplementary figure 1:

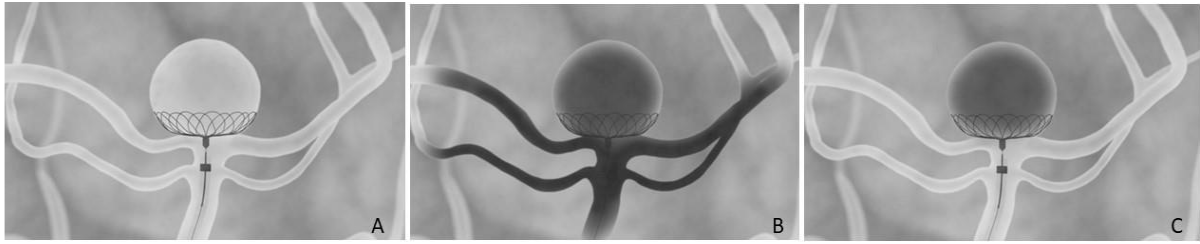

Figure 1: Example of NEQSTENT deployment for treatment of wide neck bifurcation aneurysm. A, graphic example of fluoroscopic image demonstrating device deployment through a microcatheter at the aneurysm neck. B, graphic example of initial angiogram after device deployment. C, graphic example of delayed angiographic appearances after device deployment. This demonstrates the desired flow diversion property of the NEQSTENT device for neck bridging and protection.

### Supplementary figure 2:

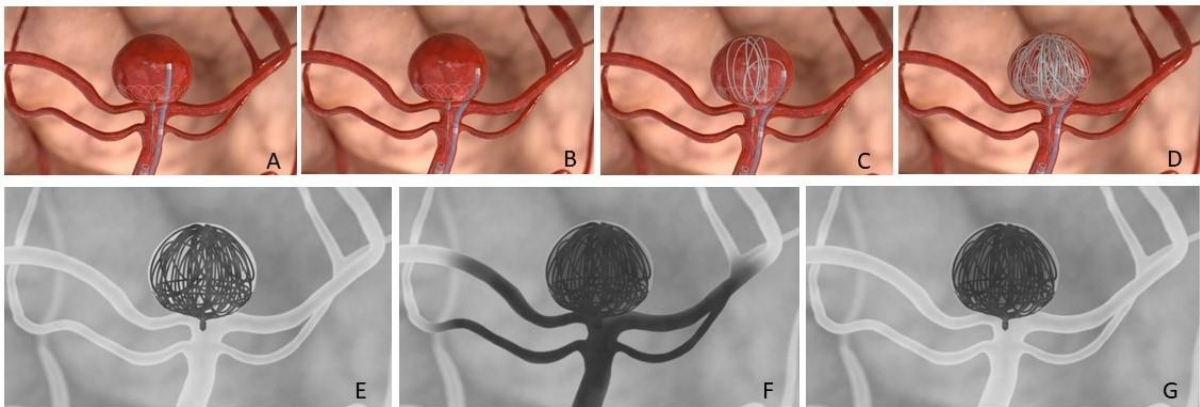

Figure 2: Graphic demonstration of adjunctive coil deployment to aneurysm dome post NEQSTENT deployment. A, example of coiling microcatheter passing through the device mesh for aneurysm dome coil deployment. B, example of a jailed coiling microcatheter adjacent to the NEQSTENT device and aneurysm dome wall for coil deployment. C, example of initial coil deployment into aneurysm dome with NEQSTENT in situ along aneurysm neck. D, E, 3D and angiographic example of complete aneurysm appearance post NEQSTENT and adjunct coil deployment. F, G, Graphic example of initial and delayed angiographic appearances post NEQSTENT and adjunct coil deployment, with stagnation of contrast within the aneurysm.

## Supplementary table 1:

| ID | Aneurysm characteristics and treatment |                |                    |           |      |             |               | Clinical and radiological outcome |                   |              |              |
|----|----------------------------------------|----------------|--------------------|-----------|------|-------------|---------------|-----------------------------------|-------------------|--------------|--------------|
|    | Location                               | Rupture status | Dome diameter (mm) | Neck (mm) | DN R | Device size | Complications | Immediate RROC                    | 6 month follow-up | 6 month RROC | Re-treatment |
| 1  | MCA bifurcation                        | Unruptured     | 6.8                | 5.6       | 1.2  | 11          | Y             | 1                                 | MRA               | 1            | No           |
| 2  | Basilar tip                            | Ruptured       | 10.5               | 7.2       | 1.5  | 11          | N             | 1                                 | MRA               | 1            | No           |
| 3  | ACOM                                   | Ruptured       | 12.1               | 4.8       | 2.5  | 9           | Y             | 1                                 | MRA               | 1            | No           |
| 4  | Basilar tip                            | Ruptured       | 11.1               | 5.6       | 2.0  | 11          | N             | 1                                 | MRA               | 1            | No           |
| 5  | Basilar tip                            | Unruptured     | 12.0               | 10.8      | 1.1  | 14          | N             | 3a                                | DSA               | 3a           | Yes          |
| 6  | ICA termination                        | Unruptured     | 5.7                | 3.4       | 1.7  | 7           | N             | 1                                 | MRA               | 1            | No           |
| 7  | ACOM                                   | Unruptured     | 6.4                | 5.6       | 1.2  | 9           | N             | 1                                 | MRA               | 1            | No           |
| 8  | ACOM                                   | Ruptured       | 14.5               | 6.8       | 2.1  | 14          | N             | 1                                 | MRA               | 1            | No           |
| 9  | MCA bifurcation                        | Unruptured     | 5.0                | 3.7       | 1.3  | 7           | N             | 1                                 | MRA               | 1            | No           |
| 10 | ACOM                                   | Ruptured       | 10.7               | 4.0       | 2.7  | 9           | N             | 1                                 | MRA               | 1            | No           |
| 11 | MCA                                    | Unruptured     | 5.6                | 2.9       | 1.9  | 7           | N             | 1                                 | CTA               | 1            | No           |
| 12 | ICA termination                        | Unruptured     | 17.0               | 6.0       | 2.8  | 14          | N             | 2                                 | MRA               | 2            | Yes          |
| 13 | ACOM                                   | Unruptured     | 7.8                | 3.6       | 2.2  | 9           | N             | 1                                 | MRA               | 1            | No           |
| 14 | Basilar tip                            | Ruptured       | 12.5               | 9.0       | 1.4  | 14          | N             | 1                                 | MRA               | 1            | No           |
| 15 | ACOM                                   | Ruptured       | 8.5                | 5.1       | 1.7  | 11          | N             | 1                                 | -                 | -            | No           |
| 16 | MCA bifurcation                        | Unruptured     | 10.3               | 6.7       | 1.5  | 11          | N             | 1                                 | MRA               | 1            | No           |
| 17 | MCA bifurcation                        | Ruptured       | 9.9                | 5.9       | 1.7  | 14          | N             | 1                                 | -                 | -            | No           |
| 18 | MCA bifurcation                        | Ruptured       | 11.7               | 6.8       | 1.7  | 14          | N             | 1                                 | -                 | -            | No           |
| 19 | Basilar tip                            | Ruptured       | 10.2               | 4.8       | 2.1  | 9           | N             | 1                                 | MRA               | 1            | No           |
| 20 | PCOM                                   | Ruptured       | 8.1                | 3.2       | 2.5  | 7           | N             | 1                                 | MRA               | 1            | No           |
